# Supplementary material for: Self-assembled hollow CuS@AuNRs/PDA nanohybrids with synergistically enhanced photothermal efficiency
Source: Royal Society of Chemistry journal article supplement (doi:10.1039/d4dt02039a), 2024-01-01
Supplement: d4dt02039a1.pdf [file d4dt02039a1.pdf]

**Electronic supplementary information (ESI):**

**Self-assembled hollow CuS@AuNRs/PDA nanohybrids with synergistically enhanced photothermal efficiency**

Chiyin Zhang,<sup>a,b</sup> Panping Yang,<sup>a,b</sup> Jingguo Li,<sup>c</sup> Shaokui Cao,<sup>a,b</sup> Yingliang Liu<sup>a,b</sup> and Jun Shi<sup>a,b\*</sup>

<sup>a</sup> *School of Materials Science and Engineering, Zhengzhou University, Zhengzhou 450001, China.*

<sup>b</sup> *Henan Key Laboratory of Advanced Nylon Materials and Application, Zhengzhou University, Zhengzhou 450001, People's Republic of China.*

<sup>c</sup> *People's Hospital of Zhengzhou University, Zhengzhou University, Zhengzhou 450003, China.*

\* Address correspondence to E-mail: shijun@zzu.edu.cn

**Figure Captions:**

**Figure S1.** Average hydrodynamic diameters of hollow CuS measured using dynamic light scattering.

**Figure S2.** Digital photographs of HCuS@AuNRs in different media (100 µg/mL, deionized water on the left and PBS pH 7.4 on the right).

**Figure S3.** Linear fitting curves of  $\ln(M_t/M_\infty)$  versus  $\ln t$  of HCuS@AuNRs/PDA (A) at different pH values without laser irradiation, (B) at pH 4.5 upon different laser irradiation (1.6 W/cm<sup>2</sup> and 0 W/cm<sup>2</sup>).

**Figure S4.** (A) Cytotoxicity evaluation to EA.hy926 cells of HCuS@AuNRs/PDA at pH 7.4, (B) Cytotoxicity evaluation (MCF-7 cells) of HCuS@AuNRs/PDA-DOX at pH 7.4 with or without NIR irradiation.

**Table S1.** TEM-EDS element mass percentage of HCuS@AuNRs/PDA.

**Table S2.** Parameters  $k$ ,  $n$  and  $R^2$  for the DOX release of HCuS@AuNRs/PDA at different release conditions.

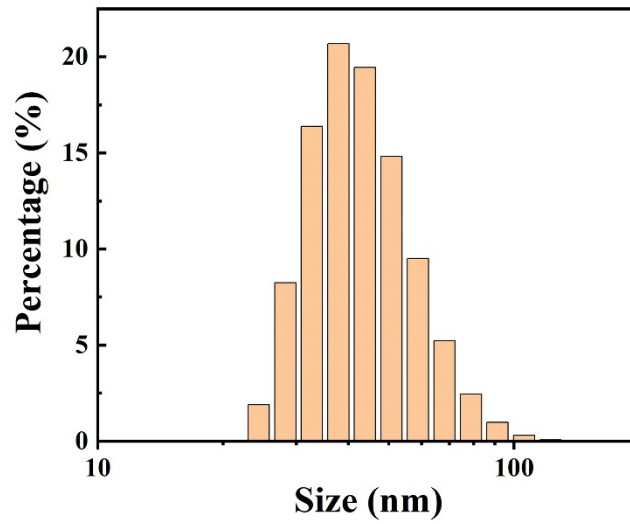

**Figure S1.** Average hydrodynamic diameters of hollow CuS measured using dynamic light scattering.

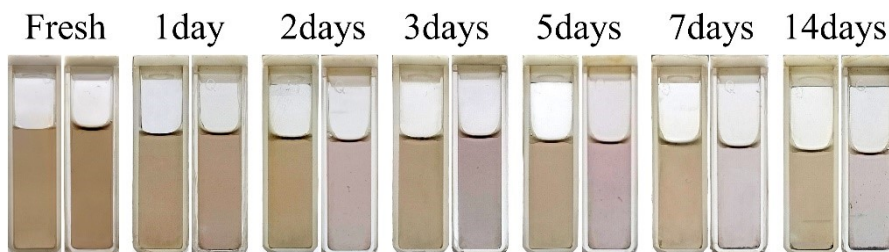

**Figure S2.** Digital photographs of HCuS@AuNRs in different media (100 µg/mL, deionized water on the left and PBS pH 7.4 on the right).

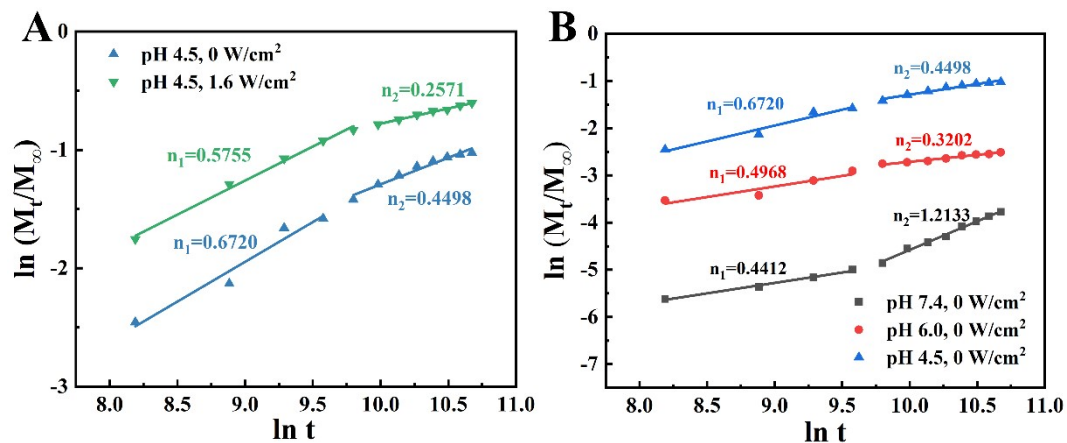

**Figure S3.** Linear fitting curves of  $\ln (M_t/M_\infty)$  versus  $\ln t$  of HCuS@AuNRs/PDA (A) at different pH values without laser irradiation, (B) at pH 4.5 upon different laser irradiation (1.6 W/cm<sup>2</sup> and 0 W/cm<sup>2</sup>).

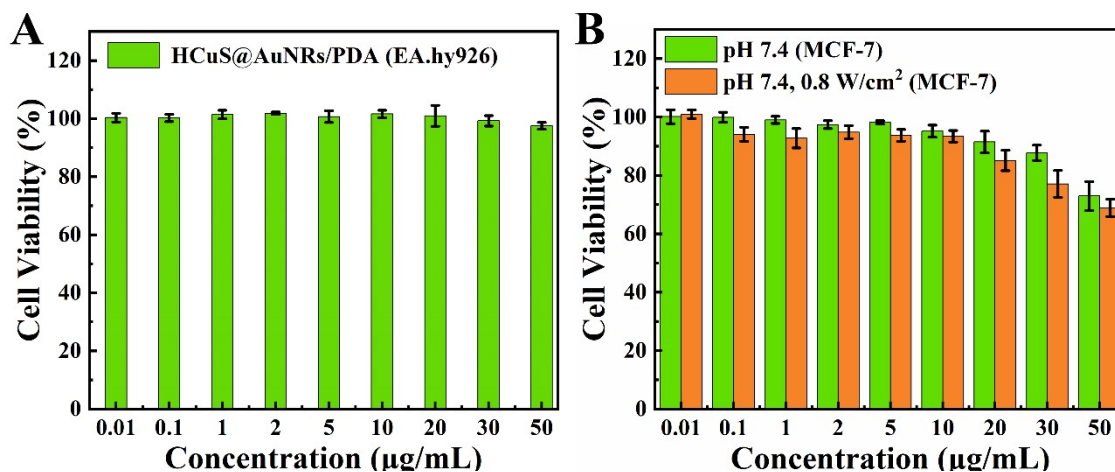

**Figure S4.** (A) Cytotoxicity evaluation to EA.hy926 cells of HCuS@AuNRs/PDA at pH 7.4, (B) Cytotoxicity evaluation (MCF-7 cells) of HCuS@AuNRs/PDA-DOX at pH 7.4 with or without NIR irradiation.

**Table S1** TEM-EDS element mass percentage of HCuS@AuNRs/PDA.

| Elements            | Cu    | S    | Au   | N    | C     |
|---------------------|-------|------|------|------|-------|
| Mass percentage (%) | 22.45 | 7.92 | 8.61 | 2.68 | 58.34 |

**Table S2** Parameters  $k$ ,  $n$  and  $R^2$  for the DOX release of HCuS@AuNRs/PDA at different release conditions.

| Sample         | release conditions            | $k$                     | $n$    | $R^2$  |
|----------------|-------------------------------|-------------------------|--------|--------|
| HCuS@AuNRs/PDA | pH 7.4, 0 W/cm <sup>2</sup>   | $2.7114 \times 10^{-7}$ | 1.0613 | 0.9786 |
| HCuS@AuNRs/PDA | pH 6.0, 0 W/cm <sup>2</sup>   | $0.9011 \times 10^{-5}$ | 0.4248 | 0.9642 |
| HCuS@AuNRs/PDA | pH 4.5, 0 W/cm <sup>2</sup>   | $1.14 \times 10^{-3}$   | 0.5444 | 0.9752 |
| HCuS@AuNRs/PDA | pH 4.5, 1.6 W/cm <sup>2</sup> | $9.71 \times 10^{-3}$   | 0.3812 | 0.9601 |
